# Supplementary material for: A new type of cyclic silicone additive for improving the energy density and power density of Li–O2 batteries
Source: Royal Society of Chemistry journal article supplement (doi:10.1039/c8ta01395k), 2018-01-01

*Supporting Information*

**A New Type of cyclic silicone Additive for Improving Energy Density and Power  
Density of Li-O<sub>2</sub> Batteries**

Chunguang Chen,<sup>a</sup> Xiang Chen,<sup>b</sup> Xiuhui Zhang,<sup>a</sup> Liangyu Li,<sup>a</sup> Congcong Zhang,<sup>b</sup> Tao  
Huang,<sup>b</sup> Aishui Yu <sup>\*a</sup>

<sup>a</sup> Department of Chemistry, <sup>b</sup> Shanghai Key Laboratory of Molecular Catalysis and Innovative  
Materials, Institut of New Energy, Collaborative Innovation Center of Chemistry for Energy  
Materials, Fudan University, Shanghai 200438, China. E-mail: asyu@fudan.edu.cn; Fax: +86-21-  
51630320; Tel: +86-21-51630320.

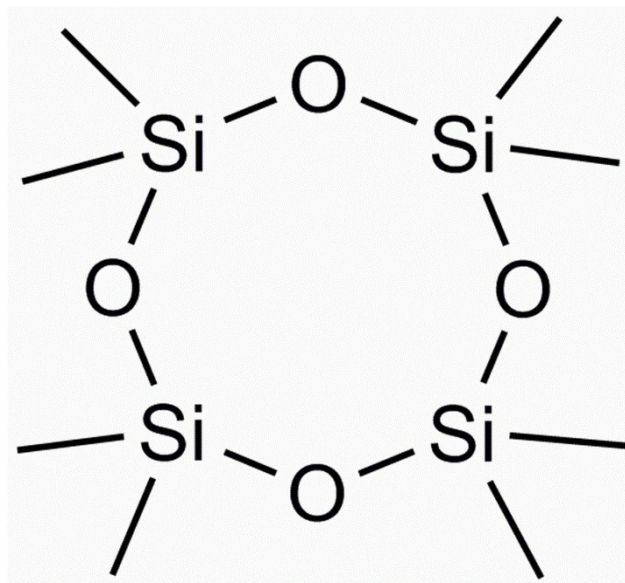

**Fig. S1.** The structure of octamethylcyclotetrasiloxane (OMTS).

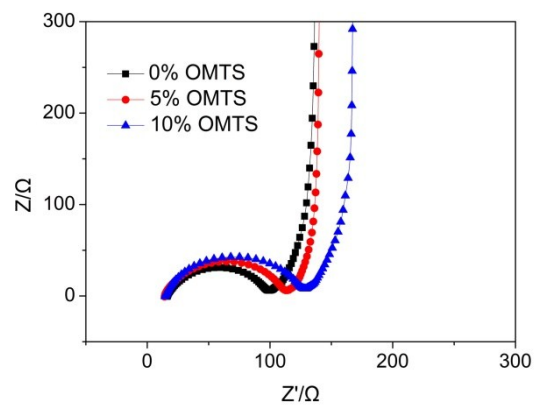

**Fig. S2.** EIS of Li-O<sub>2</sub> batteries at open-circuit potential with various amounts of OMTS content at a storage time of 2h under O<sub>2</sub> atmosphere.

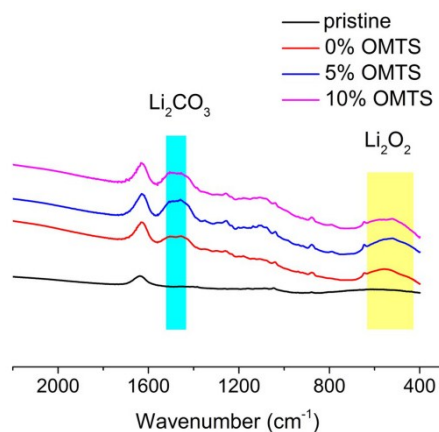

**Fig. S3.** FTIR measurements of the electrode at the end of first discharge with various amounts of OMTS content.

**Explanation:** It is obvious that the discharge products are mainly  $\text{Li}_2\text{O}_2$  with a characteristic peak at  $556\text{ cm}^{-1}$ . Some by-products occur inevitably in the process of discharge. The blue area corresponds to the peak of by-product  $\text{Li}_2\text{CO}_3$  peak.

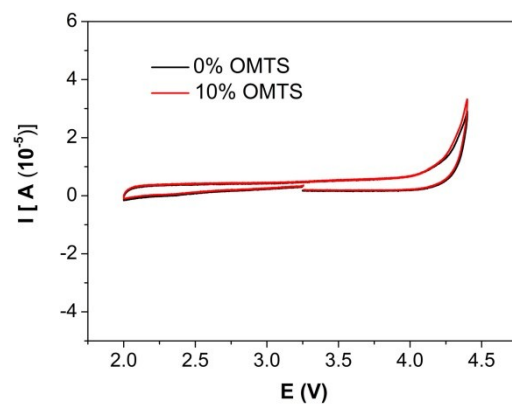

**Fig. S4.** CV curves under Ar atmosphere at a scan rate of  $100 \text{ mV s}^{-1}$  in three-electrode system.

Glassy carbon (GC),  $\text{Ag}/\text{Ag}^+$  ( $\text{CH}_3\text{CN}$ ,  $0.01 \text{ M AgNO}_3 + 0.1 \text{ M TBAPF}_6$ ) and platinum (Pt) sheet were employed as the working electrode, reference electrode and counter electrode, respectively.

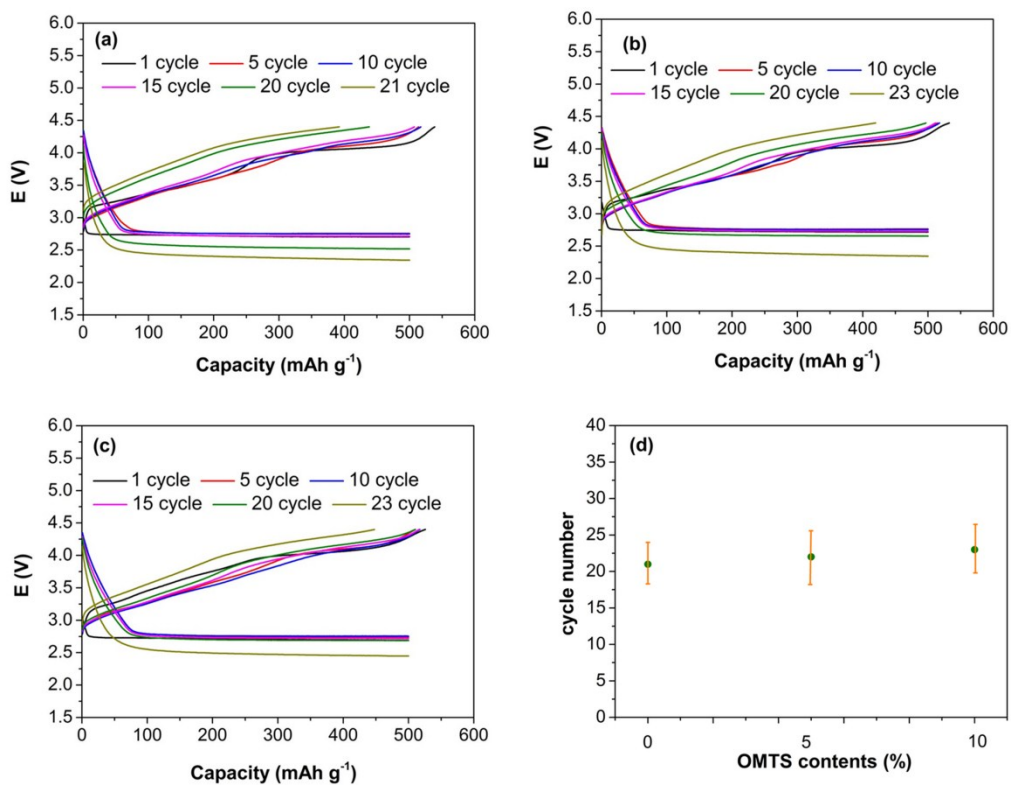

**Fig. S5.** Cyclic performance of Li-O<sub>2</sub> batteries in the electrolyte system with various amounts of OMTS content: (a) 0% OMTS, (b) 5% OMTS, and (c) 10% OMTS. (d) cycle number in different electrolytes.

## Supplementary Methods

### 1. Measurement the oxygen solubility of diffusion coefficient

The oxygen solubility and diffusion coefficient of the electrolytes were carried out in 0.1 M TBAPF<sub>6</sub> salt by the potential-step chronoamperometry for ORR at a 25µm Pt microelectrode. The test condition was firstly holding a potential where no faradic process was evident and then stepping to a potential where diffusion-limited ORR took place. The current was measured for pulse width of 10 s and a sample interval of 1 ms. The values of oxygen solubility and diffusion coefficient were determined by fitting the potential-step chronoamperometric curve using a nonlinear curve fitting function using Shoup and Szabo's equation.<sup>23, 24</sup>

$$I = -4nFDrc_0f(\tau)$$

Where

$$f(\tau) = 0.7854 + 0.8862\tau^{-1/2} + 0.2146e^{-0.7823\tau^{-3/2}}$$

$$\tau = \frac{4Dt}{r^2}$$

Where r is the radius of microdisk electrode, c<sub>0</sub> is the initial concentration and t is the time.

## 2. Measurement the yield of Li<sub>2</sub>O<sub>2</sub> of discharge.

- Calculate the yield of Li<sub>2</sub>O<sub>2</sub> during discharge

Li<sub>2</sub>O<sub>2</sub> yields (Y<sub>Li<sub>2</sub>O<sub>2</sub></sub>) was calculated using the following equation:

$$Y_{\text{Li}_2\text{O}_2} = n_{\text{Li}_2\text{O}_2, \text{t}} / n_{\text{Li}_2\text{O}_2, \text{e}}$$

Where,  $n_{\text{Li}_2\text{O}_2, \text{t}}$  is the amount of Li<sub>2</sub>O<sub>2</sub> titrated after discharge.  $n_{\text{Li}_2\text{O}_2, \text{e}}$  is the amount of Li<sub>2</sub>O<sub>2</sub> expected given a 2 e<sup>-</sup>/ Li<sub>2</sub>O<sub>2</sub> process during discharge. All dates were tested at least three replicate trials.

- Titration of Li<sub>2</sub>O<sub>2</sub> after discharge

Cathodes are extracted from discharged or charged cells in an Ar glove box and dried under vacuum. The electrode was placed in an unsealed conical flask and the conical flask is then sealed with a silicone septa lid and transferred out of the glove box. 10 mL of de-ionized water is injected into the sealed vial using a syringe. The flask was vigorously shaken (about 1 min) to promote the complete reaction of Li<sub>2</sub>O<sub>2</sub> with H<sub>2</sub>O. The alkaline solution was titrated with a standard 5 mmol L<sup>-1</sup> of HCl, and the end point was indicated by 0.1 mL of phenolphthalein in isopropanol.

Involved reaction:

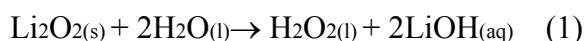

- 1) After the alkaline titration was finished, three reagents were added into the existing solution in sequence: 2 mL of 2 wt% KI in H<sub>2</sub>O, 0.4 mL of 60 wt% H<sub>2</sub>SO<sub>4</sub>, and 100 μL of a molybdate based catalyst solution. The catalyst solution was prepared by dissolving 1 g ammonium molybdate in 10 mL of 30 wt% ammonia aqueous solution, followed by adding 3 g of ammonium nitrate and



diluting the solution to 50 mL total using de-ionized water. The resultant solution turns yellow upon reagent addition due to I<sub>2</sub> formation, and the I<sub>2</sub> was immediately titrated to a pale yellow color using 2 mmol L<sup>-1</sup> of Na<sub>2</sub>S<sub>2</sub>O<sub>3</sub> solution. At this point, 0.1 mL of 5 wt% starch indicator was added, which turned blue, and the titration was continued until the color disappeared.

Involved reactions:

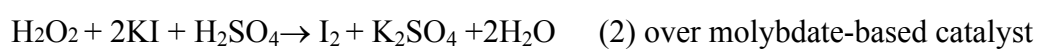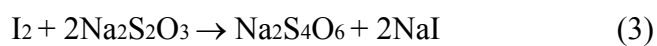

Supplement: c8ta01395k1.pdf [file c8ta01395k1.pdf]
